# Supplementary material for: Update on Nox function, site of action and regulation in Botrytis cinerea
Source: PubMed Central journal article supplement (PMC5611593; doi:10.1186/s40694-016-0026-6), 2016-10-07
Supplement: 40694_2016_26_MOESM1_ESM.pdf [file 40694_2016_26_MOESM1_ESM.pdf]

S1

| Strain                           |
|----------------------------------|
| $\Delta bcnoxA$                  |
| $\Delta bcnoxA-C$                |
| $\Delta bcnoxA::bcnoxA\_w/o\ SP$ |
| B05.10 + roGFP2_NoxA             |
| B05.10 + NoxA_roGFP2             |
| $\Delta bcnoxA:C1$               |
| $\Delta bcnoxA:C2$               |
| $\Delta bcnoxA:C3$               |
| $\Delta bcnoxB$                  |
| $\Delta bcnoxB:C1$               |
| $\Delta bcnoxB:C2$               |
| $\Delta bcnoxB:C3$               |
| $\Delta bcnoxB::bcnoxB\_HDEL$    |
| $\Delta bcnoxD$                  |
| $\Delta bcnoxD::bcnoxD\_HDEL$    |

| <b>Genotype</b>                                                 |
|-----------------------------------------------------------------|
| B05.10 $\Delta bcnoxA::nat1$                                    |
| B05.10 $\Delta bcnoxA (nat)_{bcnoxA\_gfp} (hph)$                |
| $\Delta bcnoxA (nat)::bcnoxA\_w/o\ SP (hyg) in bcniiA$          |
| B05.10, <i>roGFP2:bcnoxA</i> in <i>bcniaD</i>                   |
| B05.10, <i>bcnoxA:roGFP2</i> in <i>bcniiA</i>                   |
| $\Delta bcnoxA (nat1)_{PnoxB\_bcnoxB\_1-129\_bcnoxA} in bcniiA$ |
| $\Delta bcnoxA (nat1)_{PnoxB\_bcnoxA} in bcniiA$                |
| $\Delta bcnoxA (nat1)_{PnoxA\_bcnoxB} in bcniiA$                |
| B05.10 $\Delta bcnoxB::hph$                                     |
| $\Delta bcnoxB (hph)_{PnoxB\_bcnoxB\_1-129\_bcnoxA} in bcniiA$  |
| $\Delta bcnoxB (hph)_{PnoxB\_bcnoxA} in bcniiA$                 |
| $\Delta bcnoxB (hph)_{PnoxA\_bcnoxB} in bcniiA$                 |
| $\Delta bcnoxB (hph)_{bcnoxB\_HDEL} (nat) in bcniaD$            |
| B05.10 $\Delta bcnoxD::hph$                                     |
| $\Delta bcnoxD (hph)_{bcNoxD\_HDEL} (nat) in bcniaD$            |

| Description                                                                                                                           |
|---------------------------------------------------------------------------------------------------------------------------------------|
| Deletion of <i>bcnoxA</i>                                                                                                             |
| Complementation of $\Delta bcnoxA$ with <i>bcnoxA_gfp</i>                                                                             |
| Complementation of $\Delta bcnoxA$ with <i>bcnoxA</i> without the putative signalpeptide (AA 1-41)                                    |
| Wild type with integration of <i>bcnoxA</i> fused to <i>roGFP2</i> at the 5'end; integration in <i>bcniaD</i> locus                   |
| Wild type with integration of <i>bcnoxA</i> fused to <i>roGFP2</i> at the 3'end; integration in <i>bcniiA</i> locus                   |
| Complementation of <i>bcnoxA</i> with <i>bcnoxA</i> fused to the first 129 aa of <i>bcnoxB</i> under the control of the <i>bcnoxB</i> |
| Complementation of <i>bcnoxA</i> with <i>bcnoxA</i> under the control of the <i>bcnoxB</i> promotor                                   |
| Complementation of <i>bcnoxA</i> with <i>bcnoxB</i> under the control of the <i>bcnoxA</i> promotor                                   |
| Deletion of <i>bcnoxB</i>                                                                                                             |
| Complementation of <i>bcnoxB</i> with <i>bcnoxA</i> fused to the first 129 aa of <i>bcnoxB</i> under the control of the <i>bcnoxB</i> |
| Complementation of <i>bcnoxB</i> with <i>bcnoxA</i> under the control of the <i>bcnoxB</i> promotor                                   |
| Complementation of <i>bcnoxB</i> with <i>bcnoxB</i> under the control of the <i>bcnoxA</i> promotor                                   |
| Complementation of <i>bcnoxB</i> with <i>bcnoxB</i> fused to the HDEL motif for ER retention                                          |
| Deletion of <i>bcnoxD</i>                                                                                                             |
| Complementation of <i>bcnoxD</i> with <i>bcnoxD</i> fused to the HDEL motif for ER retention                                          |

| <b>Reference</b>       |
|------------------------|
| Segmüller et al., 2008 |
| Siegmund et al. 2013   |
| This study             |
| This study             |
| This study             |
| This study             |
| This study             |
| This study             |
| Segmüller et al., 2008 |
| This study             |
| This study             |
| This study             |
| This study             |
| Siegmund et al., 2015  |
| This study             |
