# Supplementary material for: Update on Nox function, site of action and regulation in Botrytis cinerea
Source: PubMed Central journal article supplement (PMC5611593; doi:10.1186/s40694-016-0026-6), 2016-10-07
Supplement: 40694_2016_26_MOESM2_ESM.pdf [file 40694_2016_26_MOESM2_ESM.pdf]

| Nr. | Primer              | Sequence 5'--> 3'                                            | Purpose                                 |
|-----|---------------------|--------------------------------------------------------------|-----------------------------------------|
| 1   | BcnoxA_TglucR       | CATACATCTTATCTACATACGCTAGAAATGTTCTTTCCAAAACG                 | Crosscomplementation                    |
| 2   | BcnoxA_NoxBN_R      | CTTCAAAAACGTGACAGCACCCATCGTCAATTCCTCTGGCATTTCCGC             | Crosscomplementation                    |
| 3   | bcnoxBProm_PtrpC_F  | GCCCCAAAAATGCTCCTTCAATATCGTGTGGCGAGGGGGATTGG                 | Crosscomplementation                    |
| 4   | noxA_PnoxB_R        | CTTCAAAAACGTGACAGCACCCATCTTAAACGTtgCGACCTGGAATCG             | Crosscomplementation                    |
| 5   | BcnoxB_TglucR       | CATACATCTTATCTACATACGTTAGAAATTTTCTTTGCCCCAGC                 | Crosscomplementation                    |
| 6   | noxB_PnoxA_R        | CTGTCATAAGCCTTTTCAGACATCTTCTCTATATCCAAATATCCC                | Crosscomplementation                    |
| 7   | bcnoxAprrom_PtrpC_F | GCCCCAAAAATGCTCCTTCAATATCGACGACCCGGGCTCGTGCATAAG             | Crosscomplementation                    |
| 8   | Ro1                 | CTCCATCACATCACAATCGATCCAAATGGTGAGCAAGGGCGAGGAGCTG            | roGFP2_NoxA Construction (oliC_roGFP2)  |
| 9   | Ro2                 | CCATCACATCACAATCGATCCAAATGGGTGCTGTACAGTTTTTTGAAGG            | NoxA_roGFP2 Construction (oliC_NoxA)    |
| 10  | Ro3                 | CAGCTCCTCGCCCTTGCTACCATGAAATGTTCTTTCCAAAACG                  | NoxA_roGFP2 Construction                |
| 11  | Ro4                 | CGTTTTGGAAAGAACATTTTCATGGTGAGCAAGGGCGAGGAGCTG                | NoxA_roGFP2 Construction                |
| 12  | Ro5                 | CATACATCTTATCTACATACGTTACTTGTACAGCTCGTCCATGCC                | NoxA_roGFP2 Construction (roGFP2_Tgluc) |
| 13  | Ro6                 | CATACATCTTATCTACATACGCTAGAAATGTTCTTTCCAAAACG                 | roGFP2_NoxA Construction                |
| 14  | Ro7                 | CGGCATGGACGAGCTGTACAAGATGGGTGCTGTACAGTTTTTTGAAGG             | roGFP2_NoxA Construction                |
| 15  | Ro8                 | CCTTCAAAAACGTGACAGCACCCATCTGTACAGCTCGTCCATGCCG               | roGFP2_NoxA Construction                |
| 16  | Nox1                | GGGAATGGATGAACTTTACAAAATGAGTATGGATATCGAGAGGTGCC              | NoxA_w/o signal peptide Construction    |
| 17  | bcnoxA_F1           | ATGGGTGCTGTACAGTTTTTTGAAG                                    | Crosscomplementation                    |
| 18  | bcnoxB_F1           | ATGTCTGAAAAGGCTTATG                                          | Crosscomplementation                    |
| 19  | hph for             | GTCGGAGACAGAAGATGATATTGAAGGAGC                               | hph cassette                            |
| 20  | hph rev             | GTTGGAGATTTTCAGTAACGTTAAGTGGAT                               | hph cassette                            |
| 21  | BcniAD-HIbF/hi5F    | CGCATATCAGCATATCGAGATGTCC                                    | dia PCR niaD                            |
| 22  | BcniAD-HIaR/hi3R    | GAGTACCCATCCGATGGAGTTGTG                                     | dia PCR niaD                            |
| 23  | BcniAD-WT-F         | GCCACAGACTCCGCCAGATTCTAATG                                   | dia PCR niaD                            |
| 24  | BcniAD-WT-R         | CAACCATTTACGCTGCGACCACC                                      | dia PCR niaD                            |
| 25  | BcniiA-hi5F         | GCGGGGTATGGCAGCATGAGTG                                       | dia PCR niiA                            |
| 26  | BcniiA-hi3R         | CTTATAGCAAGCGCGATGTGTATC                                     | dia PCR niiA                            |
| 27  | BcniiA-WT-F         | GGTTGAGGTGGTGGAAAGATTTG                                      | dia PCR niiA                            |
| 28  | BcniiA-WT-R         | CGACCACCAAGCCTCCAGCATC                                       | dia PCR niiA                            |
| 29  | NoxD_GFP 5F         | CCATCACATCACAATCGATCCAACCATGGGAAGACTTATCAAGAACC              | NoxD_HDEL generation                    |
| 30  | Nox103              | CTTACCTCACCCCTTGGAAACCATAAGTTCATCATGAACCTTTCCCGTGGCGGATCTCCG | NoxD_HDEL generation                    |
| 31  | BcniAD_SacII_5F     | GTAACGCCAGGGTTTTCCAGTCACGACGCCGCGGGTGAATGGGATTCATTGTTTATTTTC | NoxB_HDEL generation                    |
| 32  | Nox96               | CTAATCATAATCTTATCTACATACGTTAAAGTTCATCATGGAATTTTCTTTGCCCCAG   | NoxB_HDEL generation                    |
| 33  | Tgluc_HDEL_noxB-R   | TCTTATCTACATACGTTAAAGTTCATCATGGAATTTTCTTTGCCCCAG             | NoxB_HDEL generation                    |
| 34  | BcnoxB_OGFP_F       | GGGAATGGATGAACTTTACAAAATGTCTGAAAAAGCTTATGACAG                | NoxB_HDEL generation                    |
| 35  | noxA_diaF1          | GCTCAGATCATTCTCTTTG                                          | NoxA diagnostic PCR                     |
| 36  | noxA_diaR1          | CGTAATGACCTCCTGTCAGAATG                                      | NoxA diagnostic PCR                     |
| 37  | Hph-hiF             | GTCTGGACCGATGGCTGTGTAGAAG                                    | diagnostic PCR                          |
| 38  | hph-hiR             | GACAGACGTCGCGGTGAGTTCAG                                      | diagnostic PCR                          |
| 39  | Nat1-hiF            | CGGCGAGCAGGCGCTCTACATGAGC                                    | diagnostic PCR                          |
| 40  | nat1-hiR            | GGTAAGCCGTGTCGTCAGAG                                         | diagnostic PCR                          |
