# Supplementary material for: Update on Nox function, site of action and regulation in Botrytis cinerea
Source: PubMed Central journal article supplement (PMC5611593; doi:10.1186/s40694-016-0026-6), 2016-10-07

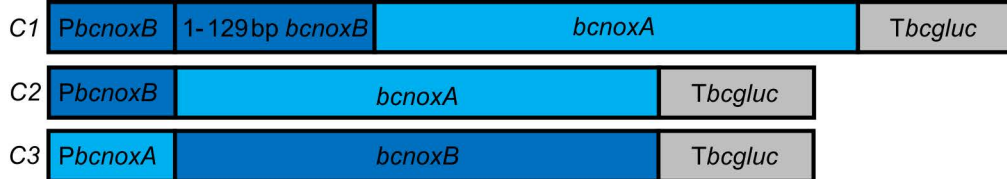

*ΔbcnoxB*

- Pathogenicity (A)
- Appressoria (B)
- ROS production (C)
- Conidiation (D)
- Stress sensitivity (E)

**A**

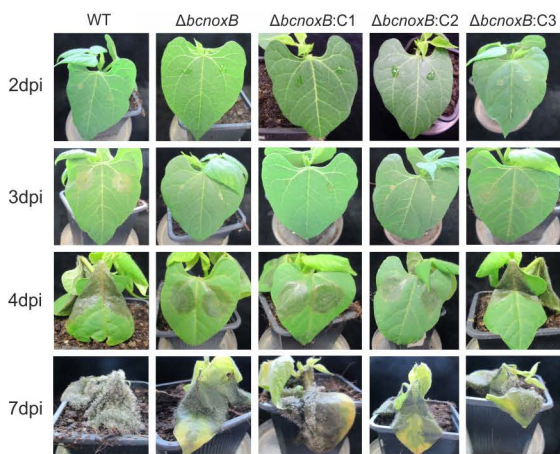

**B**

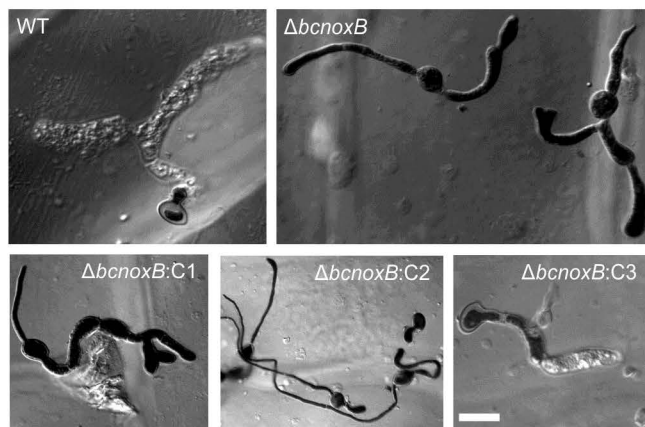

**C**

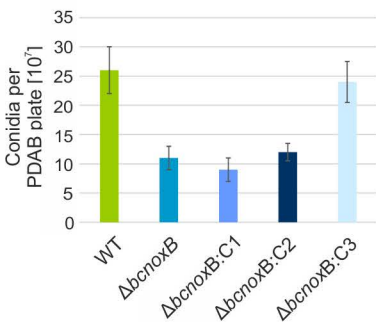

**D**

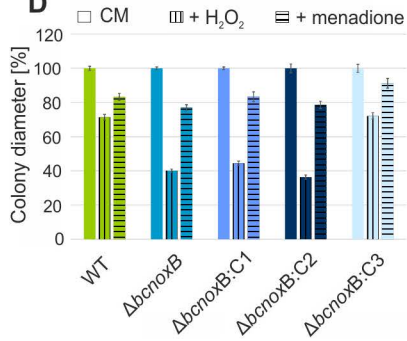

**E**

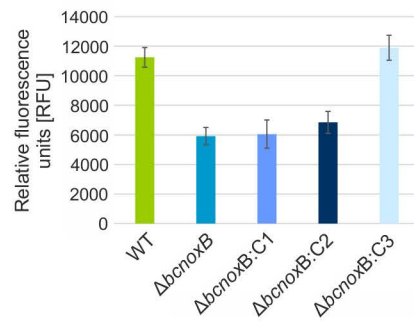

Supplement: 40694_2016_26_MOESM4_ESM.pdf [file 40694_2016_26_MOESM4_ESM.pdf]
